# Supplementary material
Source: Springer Nature journal article supplement (https://www.springermedizin.de/resource/supplementary/13058_2010_2596_MOESM7_ESM.pdf/9701780)
Supplement: MOESM7 [file 9701780]

**A**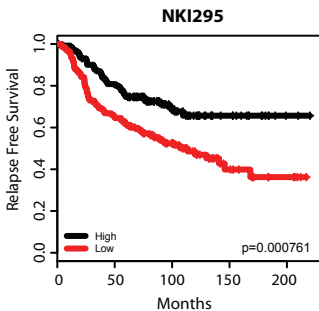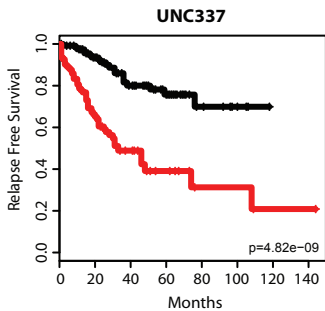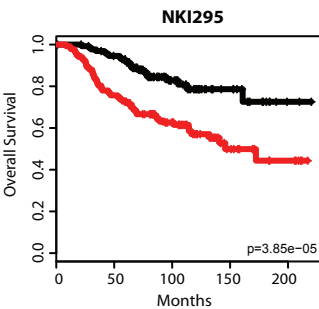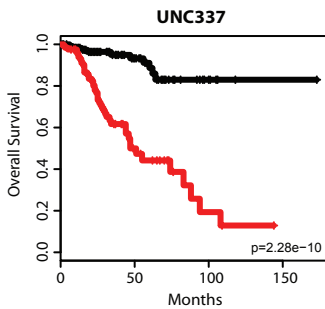**B**

| Variable                      | RFS |         |         | OS  |         |         |
|-------------------------------|-----|---------|---------|-----|---------|---------|
|                               | HR  | CI      | p-value | HR  | CI      | p-value |
| <b>ER</b>                     | 0.8 | 0.5-1.2 | 0.338   | 0.6 | 0.4-1.0 | 0.059   |
| <b>Tumor Size</b>             | 1.7 | 1.2-2.5 | 0.003   | 1.9 | 1.2-2.9 | 0.007   |
| <b>Node Status</b>            | 1.3 | 0.9-1.7 | 0.140   | 1.3 | 0.9-1.9 | 0.157   |
| <b>Histological Grade</b>     |     |         |         |     |         |         |
| 1                             | 1.0 |         |         | 1.0 |         |         |
| 2                             | 1.8 | 0.9-3.3 | 0.080   | 2.1 | 0.9-5.2 | 0.102   |
| 3                             | 1.9 | 1.0-3.5 | 0.057   | 2.4 | 1.0-5.8 | 0.054   |
| <b>Differentiation Status</b> | 2.4 | 1.6-3.6 | <0.0001 | 3.0 | 1.8-5.0 | <0.0001 |
| <b>Intrinsic Subtype</b>      |     |         |         |     |         |         |
| Luminal A                     | 1.0 |         |         | 1.0 |         |         |
| Luminal B                     | 3.4 | 2.0-5.7 | <0.0001 | 4.6 | 2.2-9.8 | <0.0001 |
| Her2-enriched                 | 3.0 | 1.6-5.4 | <0.001  | 3.7 | 1.6-8.4 | 0.002   |
| Basal-like                    | 1.7 | 0.9-3.4 | 0.132   | 2.7 | 1.1-6.7 | 0.037   |
| Claudin-low                   | 1.8 | 0.9-3.7 | 0.122   | 2.3 | 0.9-6.1 | 0.085   |
